# Supplementary material
Source: MDPI journal article supplement (https://www.mdpi.com/2571-9408/6/2/84)
Supplement: s1 [file s1]

Table S1. L\*, a\* and b\* mean values and standard deviation of each pigment applied by frescos and lime painting techniques.

| <i>Painting technique</i> | <i>Pigment</i>               | <i>Sample</i> | <i>L*</i> | <i>St.d.(L*)</i> | <i>a*</i> | <i>St.d.(a*)</i> | <i>b*</i> | <i>St.d.(b*)</i> |
|---------------------------|------------------------------|---------------|-----------|------------------|-----------|------------------|-----------|------------------|
| <b>Frescos painting</b>   | <i>Hematite</i>              | P1            | 33.60     | 0.10             | 21.74     | 0.09             | 14.58     | 0.05             |
|                           | <i>Red ochre</i>             | P2            | 43.79     | 0.07             | 20.87     | 0.06             | 13.84     | 0.06             |
|                           | <i>Minium</i>                | P3            | 66.00     | 0.09             | 49.14     | 0.04             | 60.18     | 0.09             |
|                           | <i>Cinnabar</i>              | P4            | 48.35     | 0.13             | 31.98     | 0.11             | 17.23     | 0.10             |
|                           | <i>Realgar</i>               | P5            | 66.35     | 0.12             | 19.78     | 0.05             | 40.92     | 0.04             |
|                           | <i>Yellow ochre</i>          | P6            | 57.58     | 0.08             | 22.05     | 0.05             | 42.58     | 0.03             |
|                           | <i>Massicot</i>              | P7            | 67.99     | 0.11             | 3.17      | 0.06             | 34.19     | 0.03             |
|                           | <i>Green earth</i>           | P8            | 63.56     | 0.13             | -1.51     | 0.10             | 15.36     | 0.03             |
|                           | <i>Malachite</i>             | P9            | 52.35     | 0.11             | -4.92     | 0.08             | 10.72     | 0.02             |
|                           | <i>Verdigris</i>             | P10           | 63.54     | 0.22             | -18.69    | 0.14             | -14.29    | 0.04             |
|                           | <i>Azurite</i>               | P11           | 44.75     | 0.07             | -4.76     | 0.05             | -3.21     | 0.02             |
|                           | <i>Egyptian blue</i>         | P12           | 57.07     | 0.09             | -4.88     | 0.01             | -35.71    | 0.03             |
|                           | <i>Lapis lazuli</i>          | P13           | 55.92     | 0.06             | -0.97     | 0.04             | -32.28    | 0.04             |
|                           | <i>Brown earth</i>           | P14           | 33.70     | 0.06             | 17.82     | 0.03             | 19.85     | 0.02             |
|                           | <i>Bone black</i>            | P15           | 13.95     | 0.05             | 0.13      | 0.03             | 0.03      | 0.05             |
|                           | <i>Vine black</i>            | P16           | 27.68     | 0.10             | -0.07     | 0.04             | -0.54     | 0.01             |
|                           | <i>Ivory black</i>           | P17           | 17.81     | 0.06             | 1.00      | 0.03             | 2.38      | 0.02             |
|                           | <i>Bianco di S. Giovanni</i> | P18           | 91.50     | 0.08             | 1.16      | 0.03             | 3.73      | 0.04             |
| <b>Lime painting</b>      | <i>Hematite</i>              | PL1           | 33.81     | 0.09             | 21.56     | 0.02             | 13.53     | 0.03             |
|                           | <i>Red ochre</i>             | PL2           | 45.57     | 0.07             | 19.93     | 0.06             | 12.07     | 0.03             |
|                           | <i>Minium</i>                | PL3           | 62.25     | 0.10             | 52.53     | 0.02             | 60.35     | 0.15             |
|                           | <i>Cinnabar</i>              | PL4           | 46.31     | 0.13             | 28.06     | 0.14             | 11.43     | 0.09             |
|                           | <i>Realgar</i>               | PL5           | 65.90     | 0.13             | 11.94     | 0.11             | 40.11     | 0.04             |
|                           | <i>Yellow ochre</i>          | PL6           | 60.86     | 0.07             | 17.82     | 0.03             | 34.72     | 0.03             |
|                           | <i>Massicot</i>              | PL7           | 69.12     | 0.10             | 3.86      | 0.00             | 31.82     | 0.06             |
|                           | <i>Green earth</i>           | PL8           | 69.19     | 0.07             | -1.28     | 0.04             | 11.17     | 0.03             |
|                           | <i>Malachite</i>             | PL9           | 43.14     | 0.08             | 0.76      | 0.06             | 2.80      | 0.02             |
|                           | <i>Verdigris</i>             | PL10          | 54.10     | 0.09             | -19.13    | 0.04             | -23.35    | 0.02             |
|                           | <i>Azurite</i>               | PL11          | 40.29     | 0.05             | 0.09      | 0.03             | -0.47     | 0.02             |
|                           | <i>Egyptian blue</i>         | PL12          | 50.06     | 0.22             | -0.89     | 0.07             | -29.19    | 0.17             |
|                           | <i>Lapis lazuli</i>          | PL13          | 62.40     | 0.07             | -2.29     | 0.02             | -26.77    | 0.07             |
|                           | <i>Brown earth</i>           | PL14          | 39.24     | 0.06             | 16.77     | 0.04             | 21.49     | 0.00             |
|                           | <i>Bone black</i>            | PL15          | 20.96     | 0.05             | -0.09     | 0.05             | -1.21     | 0.02             |
|                           | <i>Vine black</i>            | PL16          | 28.04     | 0.08             | -0.30     | 0.06             | -2.05     | 0.00             |
|                           | <i>Ivory black</i>           | PL17          | 25.65     | 0.04             | 0.95      | 0.03             | 1.64      | 0.01             |
|                           | <i>Bianco di S. Giovanni</i> | PL18          | 92.33     | 0.09             | 0.91      | 0.06             | 1.61      | 0.01             |
