# Supplementary material
Source: MDPI journal article supplement (https://www.mdpi.com/2571-9408/6/2/84)
Supplement: s1 [file s1]

Table S2. L\*, a\* and b\* mean values and standard deviation of mixing.

| <i>Colour</i> | <i>Sample</i> | <i>L*</i> | <i>St.d. (L*)</i> | <i>a*</i> | <i>St.d. (a*)</i> | <i>b*</i> | <i>St.d. (b*)</i> |
|---------------|---------------|-----------|-------------------|-----------|-------------------|-----------|-------------------|
| Red           | MR1           | 35.15     | 0.08              | 23.82     | 0.07              | 16.43     | 0.04              |
|               | MR2a          | 35.44     | 0.10              | 24.97     | 0.09              | 17.92     | 0.06              |
|               | MR2b          | 37.15     | 0.08              | 25.70     | 0.07              | 18.58     | 0.05              |
|               | MR2c          | 33.65     | 0.08              | 24.56     | 0.24              | 17.42     | 0.08              |
|               | MR3a          | 34.99     | 0.08              | 24.27     | 0.06              | 17.04     | 0.04              |
|               | MR3b          | 35.87     | 0.07              | 26.32     | 0.04              | 19.73     | 0.04              |
|               | MR3c          | 51.68     | 0.09              | 35.01     | 0.06              | 30.57     | 0.03              |
| Dark red      | MR4a          | 34.58     | 0.07              | 16.15     | 0.01              | 11.49     | 0.02              |
|               | MR4b          | 37.18     | 0.08              | 8.00      | 0.05              | 5.97      | 0.03              |
|               | MR4c          | 27.07     | 0.09              | 0.59      | 0.07              | 0.02      | 0.01              |
|               | MR5a          | 36.47     | 0.07              | 23.81     | 0.06              | 18.84     | 0.06              |
|               | MR5b          | 36.72     | 0.07              | 23.77     | 0.04              | 20.45     | 0.03              |
|               | MR5c          | 33.95     | 0.08              | 18.39     | 0.08              | 17.12     | 0.04              |
| Orange        | MR6a          | 34.98     | 0.08              | 22.54     | 0.07              | 17.40     | 0.03              |
|               | MR6b          | 40.09     | 0.07              | 22.49     | 0.07              | 25.04     | 0.00              |
|               | MR6c          | 36.10     | 0.06              | 22.90     | 0.05              | 20.74     | 0.01              |
| Pink          | MR7a          | 32.88     | 0.08              | 22.88     | 0.08              | 15.46     | 0.04              |
|               | MR7b          | 37.83     | 0.07              | 23.33     | 0.07              | 15.84     | 0.04              |
|               | MR7c          | 44.55     | 0.08              | 23.17     | 0.06              | 15.79     | 0.04              |
|               | MR8           | 38.72     | 0.06              | 25.41     | 0.05              | 19.33     | 0.02              |
| Yellow-brown  | MY1a          | 38.46     | 0.09              | 5.98      | 0.08              | 16.33     | 0.02              |
|               | MY1b          | 29.77     | 0.08              | 0.77      | 0.03              | 3.00      | 0.01              |
|               | MY1c          | 35.69     | 0.09              | 3.42      | 0.06              | 10.56     | 0.02              |
| Yellow        | MY2a          | 55.51     | 0.09              | 19.80     | 0.06              | 36.42     | 0.02              |
|               | MY2b          | 58.95     | 0.08              | 19.24     | 0.07              | 36.91     | 0.02              |
|               | MY2c          | 63.87     | 0.09              | 15.18     | 0.03              | 38.81     | 0.06              |
| Dark green    | MG1a          | 55.37     | 0.08              | -1.44     | 0.06              | 10.82     | 0.01              |
|               | MG1b          | 45.59     | 0.06              | -2.20     | 0.04              | 8.76      | 0.02              |
|               | MG1c          | 47.73     | 0.06              | -1.58     | 0.04              | 7.33      | 0.01              |
| Green         | MG2           | 60.77     | 0.08              | -2.33     | 0.08              | 11.32     | 0.03              |
|               | MG3           | 46.66     | 0.12              | -4.61     | 0.08              | 3.95      | 0.02              |
| Blue-grey     | MBG1          | 39.35     | 0.08              | 0.04      | 0.06              | 1.82      | 0.01              |
|               | MBG2          | 40.08     | 0.05              | 3.58      | 0.06              | 2.83      | 0.02              |
|               | MBG3          | 32.32     | 0.06              | 2.43      | 0.04              | 2.35      | 0.01              |
| Black-brown   | MB1           | 32.95     | 0.12              | 0.18      | 0.09              | 2.45      | 0.01              |
| Black-blue    | MB2           | 28.38     | 0.07              | 2.00      | 0.02              | 0.51      | 0.01              |
|               | MB3           | 23.63     | 0.10              | 0.97      | 0.07              | -0.41     | 0.03              |
